# Supplementary material for: Chemical Vapor Deposited 2D MoN Nanosheets as Stable and Uniform Surface Enhanced Raman Scattering Substrate with Thickness Dependent Sensitivity
Source: Preprints.org preprint supplement (doi:10.20944/preprints202312.0498.v1), 2023-12-07
Supplement: Supplementary file 1 [file supplementary]

**Supplementary Materials for:**

**Chemical Vapor Deposited 2D MoN Nanosheets as Stable and Uniform Surface Enhanced Raman Scattering Substrate with Thickness Dependent Sensitivity**

*Hongrong Wu1,2, Maolin Tang1, Pinsen Tong 1, Yang Hang3, Junhua Zhao1,2**

1Jiangsu Key Laboratory of Advanced Food Manufacturing Equipment and Technology, Institute of Strength and Multi-scale Mechanics of Mechanical Structures, School of Mechanical Engineering, Jiangnan University, 214122 Wuxi, PR China

2Jiangsu Province Engineering Research Center of Micro-Nano Additive and Subtractive Manufacturing, Institute of Advanced Technology, Jiangnan University, 214122 Wuxi, PR China

3Key Laboratory for Intelligent Nano Materials and Devices of the Ministry of Education, State Key Laboratory of Mechanics and Control of Mechanical Structures, College of Aerospace Engineering, Nanjing University of Aeronautics and Astronautics, Nanjing, 210016 P. R. China

*E-mail: junhua.zhao@163.com

**Figure S1**. Temperature control curves of the growth of MoO2 nanosheets (a) and during the nitridation process (b).

**Figure S2**. Temperature dependent of resistivity of the MoN nanosheets.

**Figure S3**. Laser wavelength dependent SERS effect of MoN nanosheets. Methyl violet molecules were adsorbed on MoN nanosheets by soaking in the solution with a concentration of 10-6 M for 20 min and dried in nitrogen flow. The laser wavelength selectivity of the SERS effect is another evidence for the surface plasmon resonance of the MoN nanosheets.

**Figure S4**. AFM characterization of MoN nanosheets with different thickness. (a) 3.9 nm, (b) 4.5 nm, (c) 5 nm, (d) 6.8 nm, (e) 10.2 nm, (f) 13.6 nm.

**Figure S5**. Raman spectra of quadrilateral MoN nanosheets and hexagonal MoN nanosheets.

**Figure S6**. Optical images of the MoN nanosheets after annealing in air for different temperatures.

**Figure S7**. Raman spectra of MoN nanosheets after removing the R6G molecule with methyl alcohol.
